# Supplementary figures and images for: Pacritinib abrogates the lupus phenotype in ABIN1[D485N] mice
Source: HighWire-hosted journal article supplement (doi:10.1136/lupus-2022-000822), 2023-02-01

Supplementary Figure 2

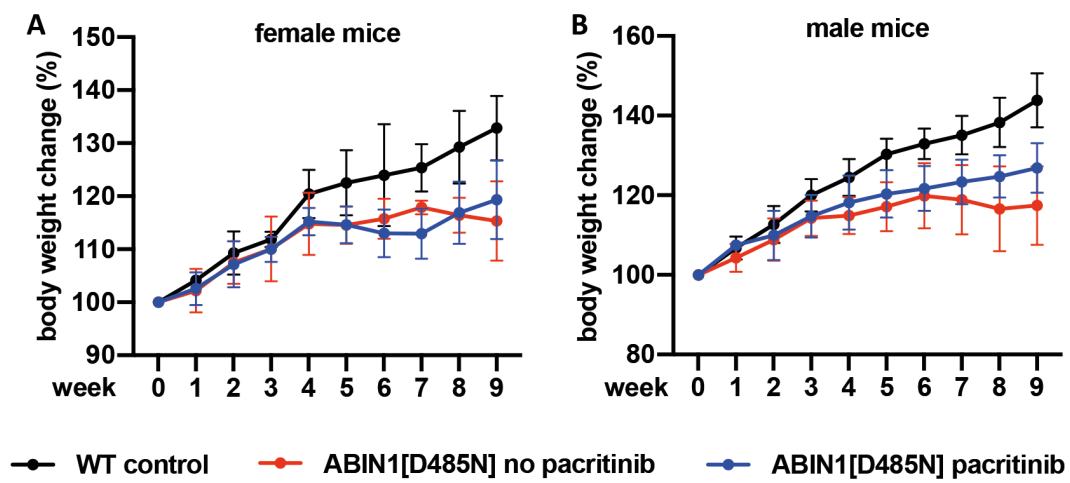

Supplement: lupus-2022-000822supp002_data_supplement.pdf [file lupus-2022-000822supp002_data_supplement.pdf]

Supplementary Figure 3

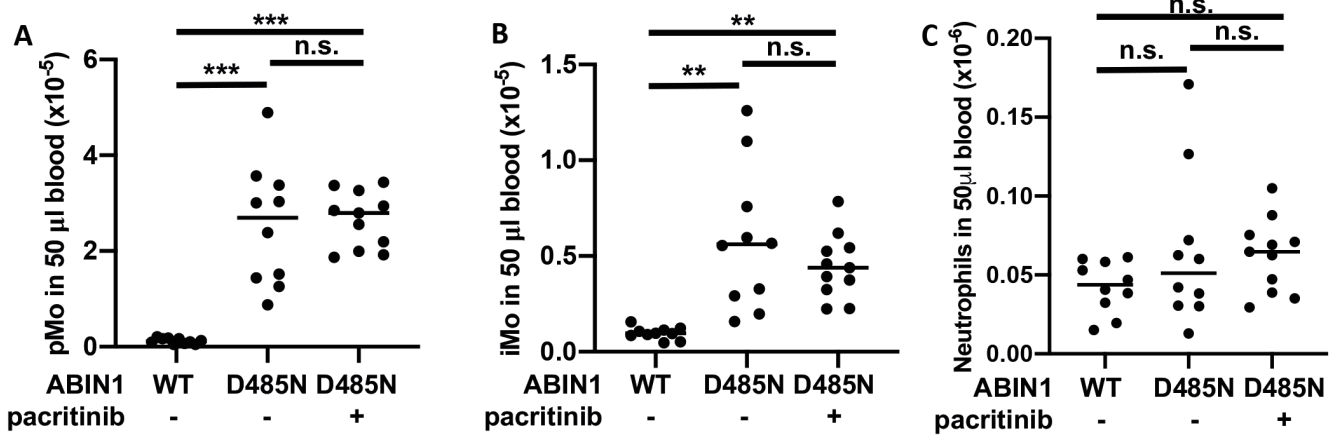

Supplement: lupus-2022-000822supp003_data_supplement.pdf [file lupus-2022-000822supp003_data_supplement.pdf]

Supplementary Figure 4

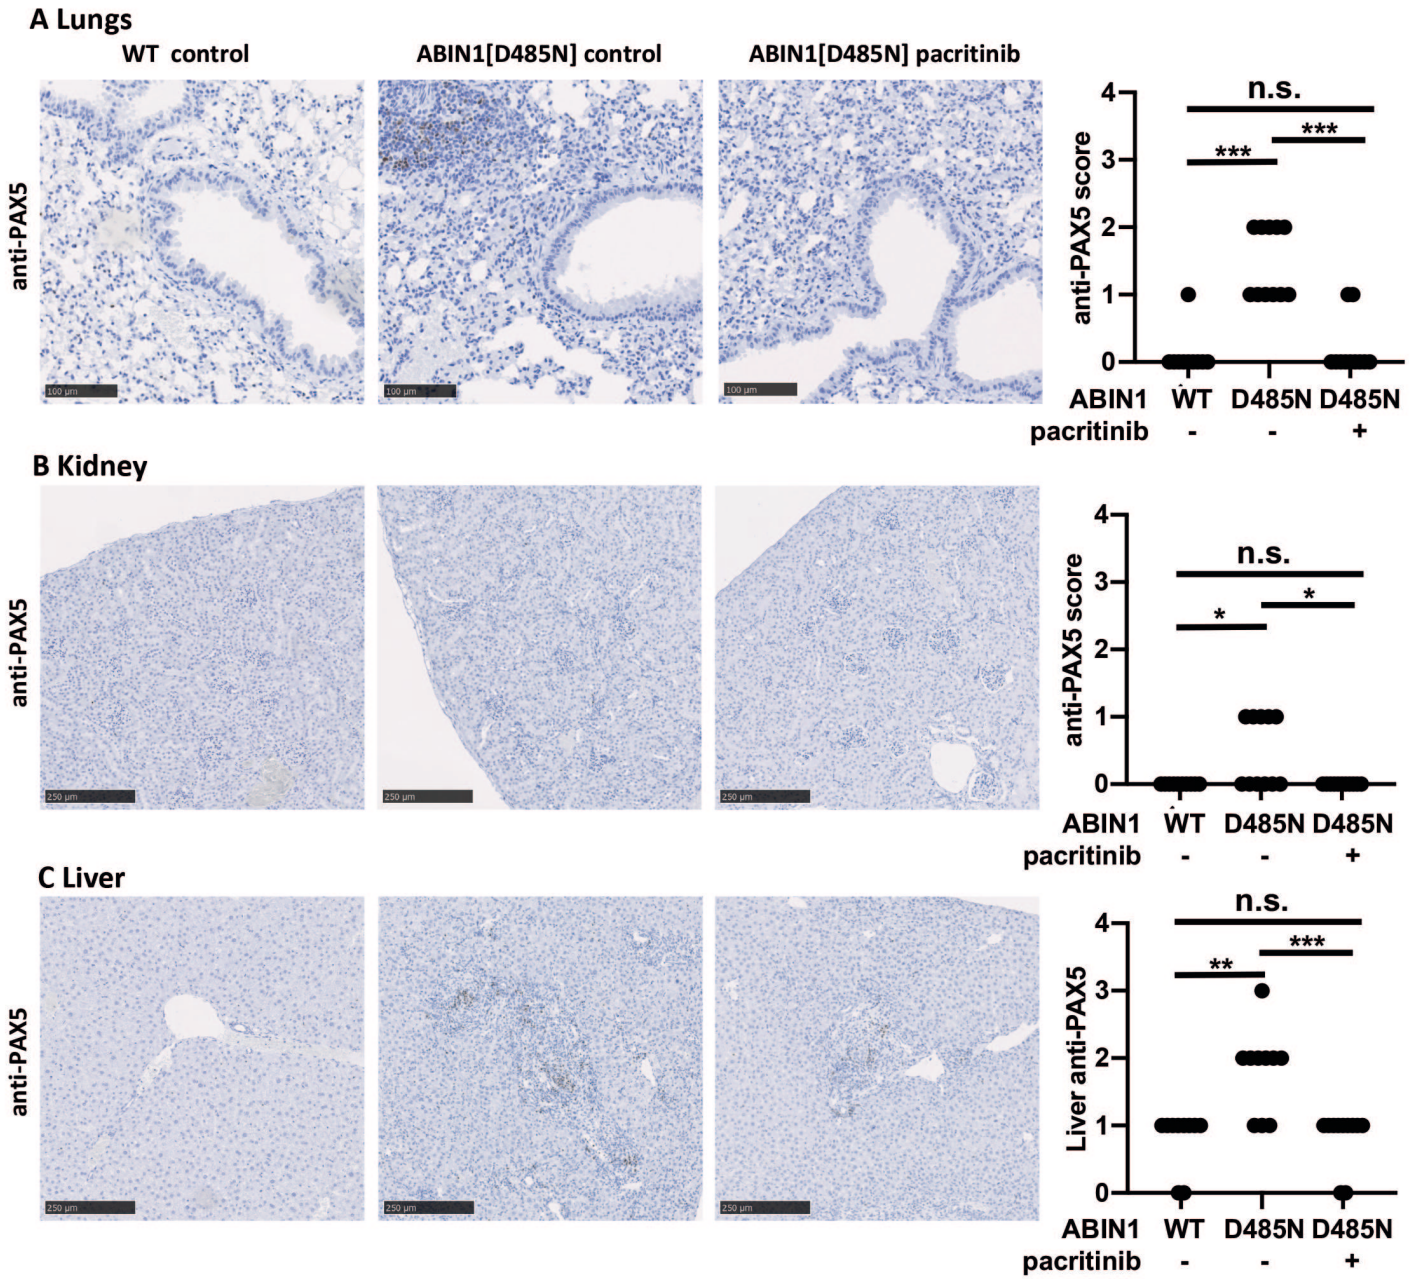

Supplement: lupus-2022-000822supp004_data_supplement.pdf [file lupus-2022-000822supp004_data_supplement.pdf]

Supplementary Figure 5

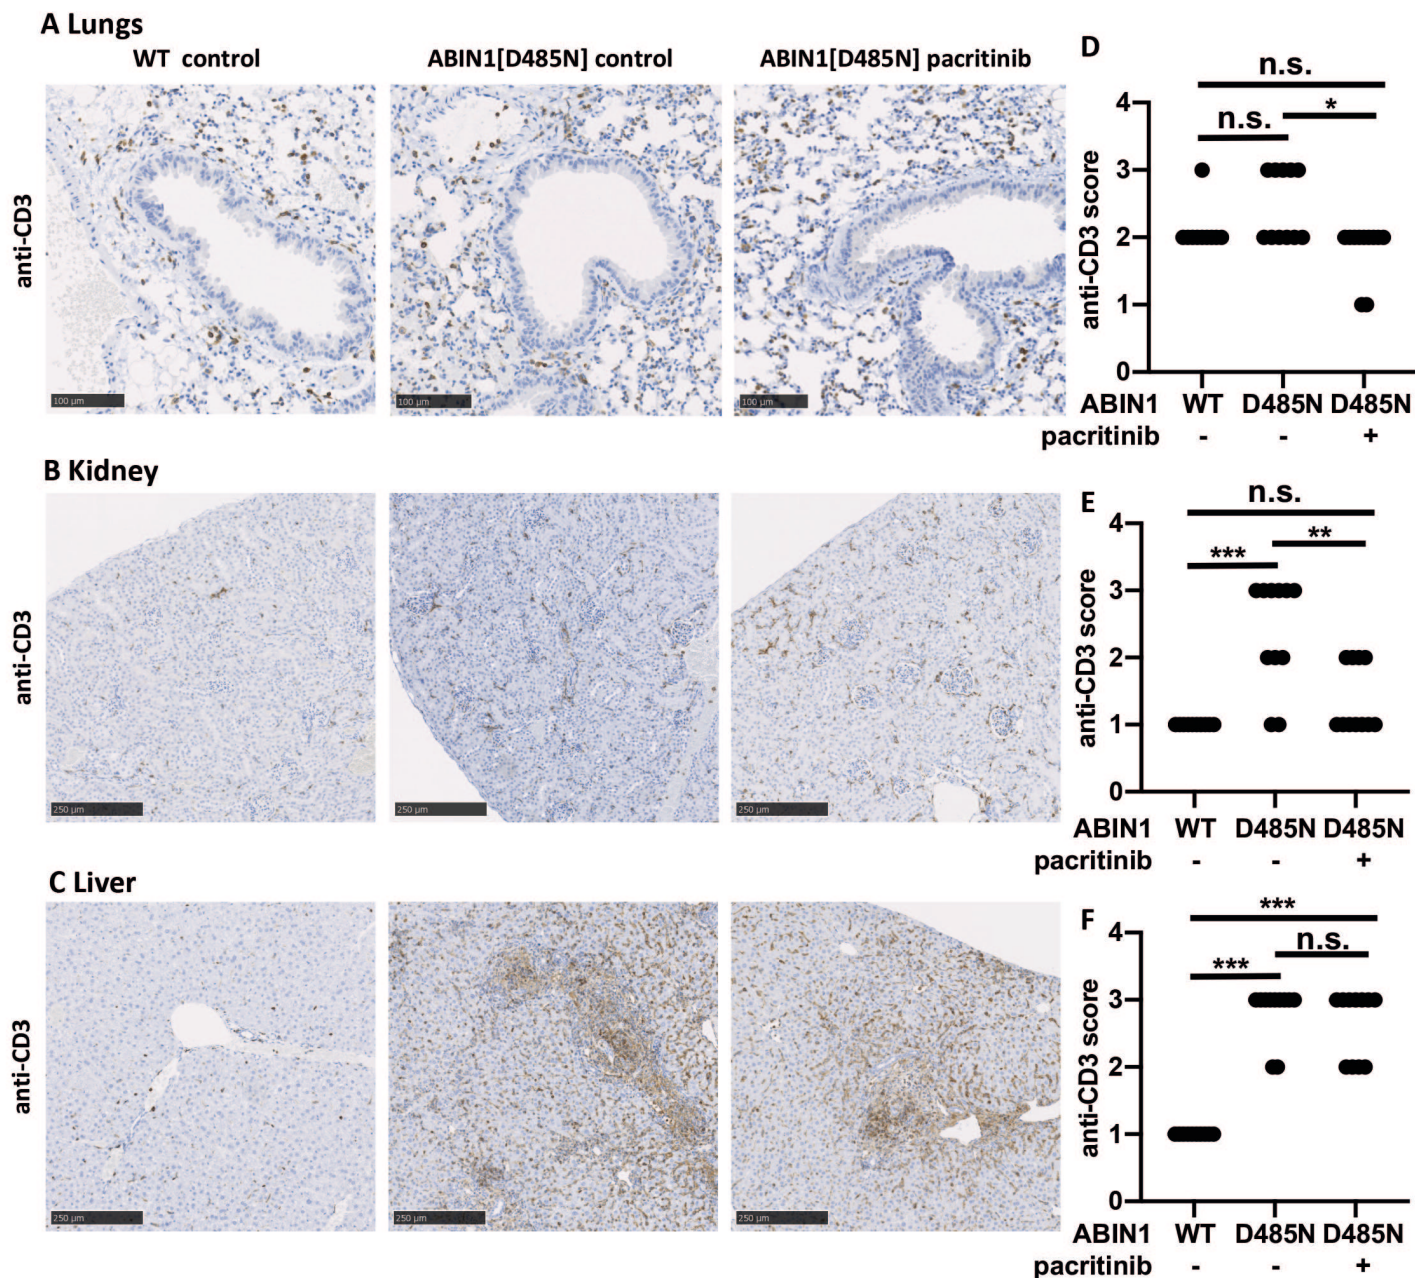

Supplement: lupus-2022-000822supp005_data_supplement.pdf [file lupus-2022-000822supp005_data_supplement.pdf]

Supplementary Figure 6

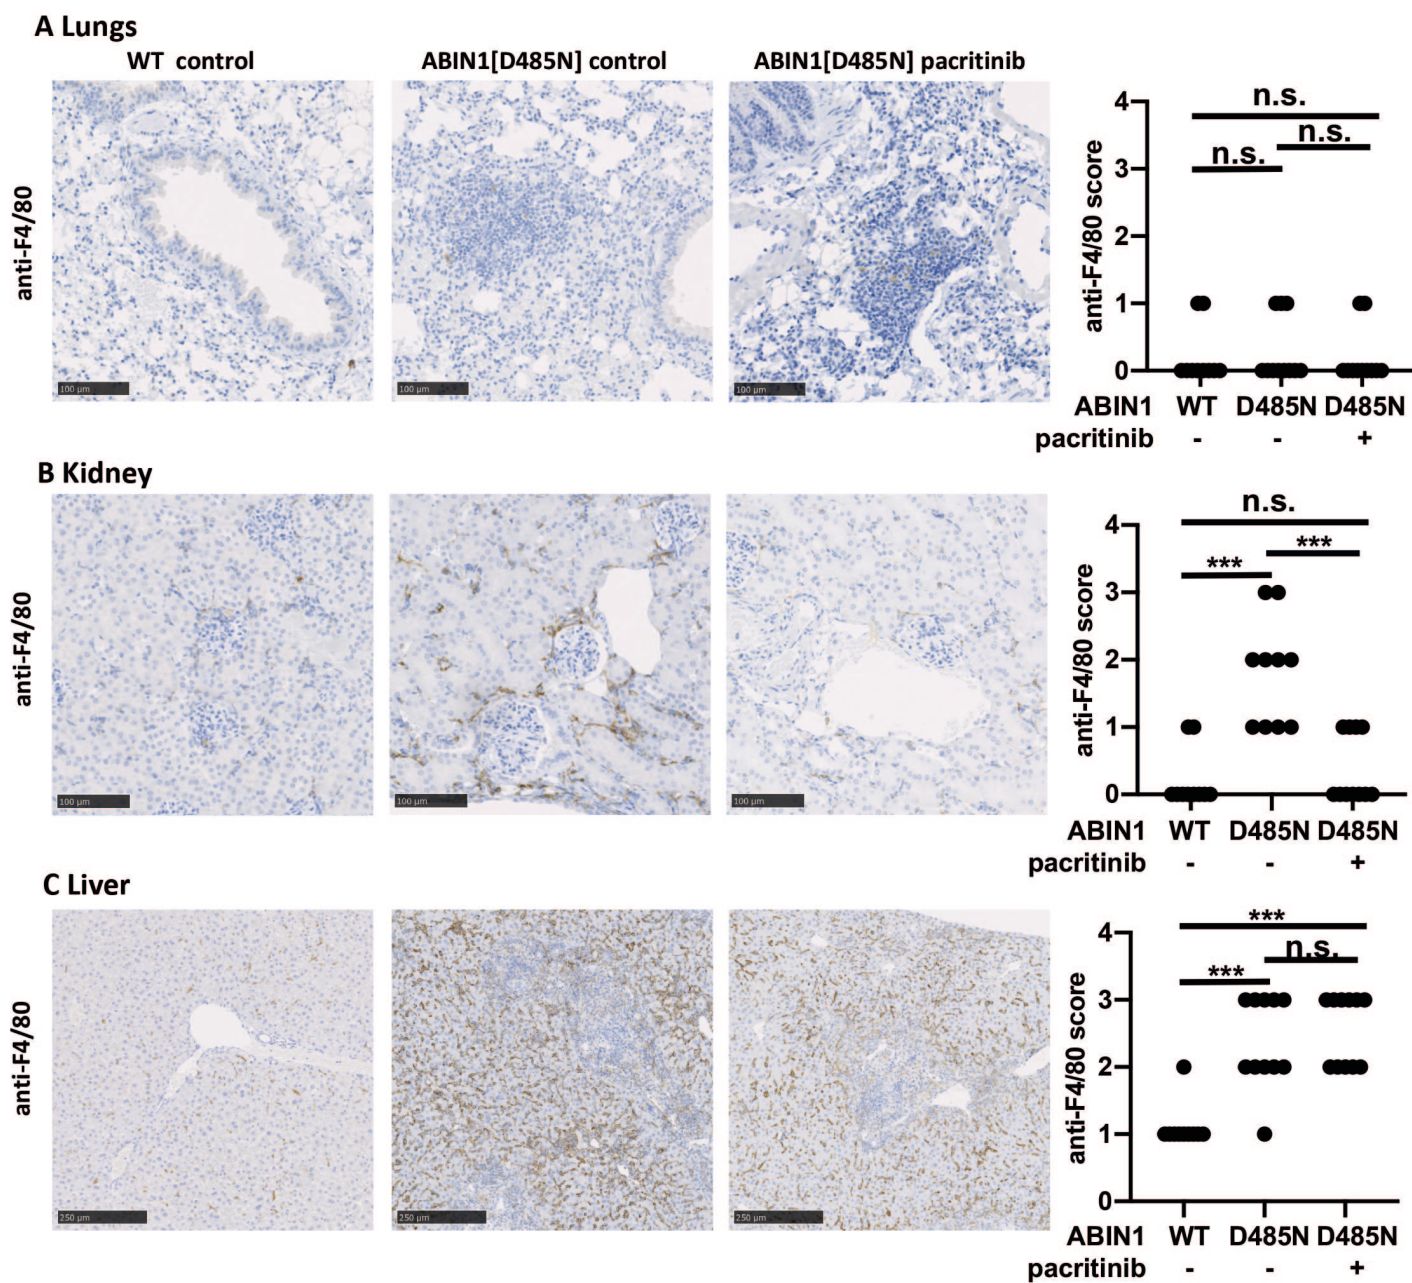

Supplement: lupus-2022-000822supp006_data_supplement.pdf [file lupus-2022-000822supp006_data_supplement.pdf]

## Supplementary Figure 7

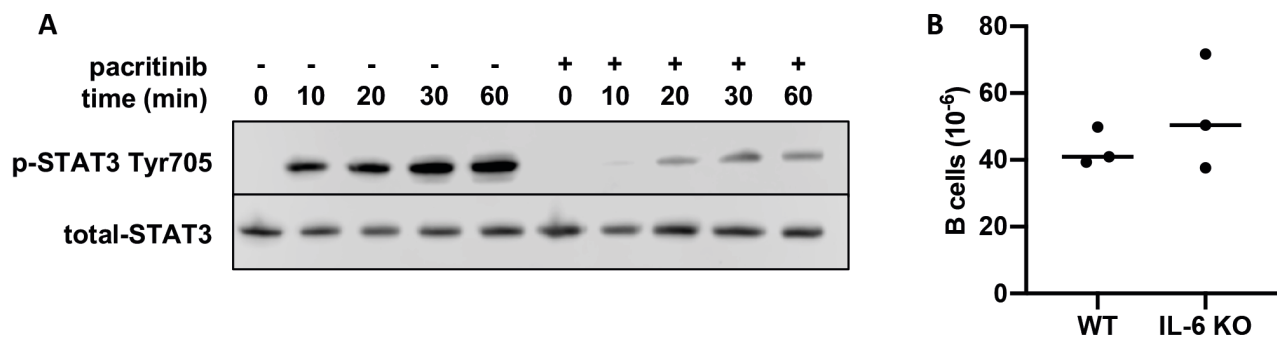

Supplement: lupus-2022-000822supp007_data_supplement.pdf [file lupus-2022-000822supp007_data_supplement.pdf]
